# Supplementary material for: Development of a transition metal-free polymerization route to functional conjugated polydiynes from a haloalkyne-based organic reaction
Source: Royal Society of Chemistry journal article supplement (doi:10.1039/c6py00050a), 2016-01-01
Supplement: c6py00050a1.pdf [file c6py00050a1.pdf]

*Electronic Supporting Information*

Development of transition metal-free polymerization route to  
functional conjugated polydiynes from haloalkyne-based organic  
reaction

Yun Zhang,<sup>ab</sup> Engui Zhao,<sup>ab</sup> Haiqin Deng,<sup>ab</sup> Jacky W. Y. Lam,<sup>\*ab</sup> and Ben Zhong Tang<sup>\*abcd</sup>

<sup>a</sup> HKUST-Shenzhen Research Institute, No. 9 Yuexing 1st RD, South Area, Hi-tech Park, Nanshan, Shenzhen 518057, China.

<sup>b</sup> Department of Chemistry, Institute for Advanced Study, Institute of Molecular Functional Materials, Division of Biomedical Engineering, Division of Life Science and State Key Laboratory of Molecular Neuroscience, The Hong Kong University of Science & Technology, Clear Water Bay, Kowloon, Hong Kong.

<sup>c</sup> Guangdong Innovative Research Team, SCUT-HKUST Joint Research Laboratory, State Key Laboratory of Luminescent Materials and Devices, South China University of Technology, Guangzhou 510640, China.

<sup>d</sup> Hong Kong Branch of Chinese National Engineering Research Center for Tissue Restoration and Reconstruction.

\* Corresponding authors: J. W. Y. Lam (Email: [chjacky@ust.hk](mailto:chjacky@ust.hk)) or B. Z. Tang (Email: [tangbenz@ust.hk](mailto:tangbenz@ust.hk)).

## Table of contents

**Table S1** Crystal data and structure refinement for model compound 7.

**Table S1** Crystal data and structure refinement for model compound 7.

---

|                                                |                                                               |                              |
|------------------------------------------------|---------------------------------------------------------------|------------------------------|
| Empirical formula                              | $C_{56}H_{37}\cdot CHCl_3$                                    |                              |
| Formula weight                                 | 829.22                                                        |                              |
| Temperature                                    | 100.0(5) K                                                    |                              |
| Crystal system                                 | monoclinic                                                    |                              |
| Space group                                    | $P2_1/c$                                                      |                              |
| Unit cell dimensions                           | $a = 9.65924(8) \text{ \AA}$                                  | $\alpha = 90^\circ$ .        |
|                                                | $b = 9.12014(9) \text{ \AA}$                                  | $\beta = 91.6555(9)^\circ$ . |
|                                                | $c = 50.6162(5) \text{ \AA}$                                  | $\gamma = 90^\circ$ .        |
| Volume                                         | $4457.10(7) \text{ \AA}^3$                                    |                              |
| Z                                              | 4                                                             |                              |
| Density (calculated)                           | $1.236 \text{ g/cm}^3$                                        |                              |
| $\mu/\text{mm}^{-1}$                           | 2.142                                                         |                              |
| F(000)                                         | 1724.0                                                        |                              |
| Crystal size/ $\text{mm}^3$                    | $0.25 \times 0.2 \times 0.08$                                 |                              |
| Radiation                                      | $\text{CuK}\alpha$ ( $\lambda = 1.54184$ )                    |                              |
| $2\theta$ range for data collection/ $^\circ$  | 9.71 to 133.992                                               |                              |
| Index ranges                                   | $-9 \leq h \leq 11, -10 \leq k \leq 7, -60 \leq l \leq 60$    |                              |
| Reflections collected                          | 18636                                                         |                              |
| Independent reflections                        | 7798 [ $R_{\text{int}} = 0.0181, R_{\text{sigma}} = 0.0243$ ] |                              |
| Data/restraints/parameters                     | 7798/0/553                                                    |                              |
| Completeness to $\theta = 66.5^\circ$          | 98.1%                                                         |                              |
| Goodness-of-fit on $F^2$                       | 1.002                                                         |                              |
| Final R indexes [ $I \geq 2\sigma(I)$ ]        | $R_1 = 0.0895, wR_2 = 0.2148$                                 |                              |
| Final R indexes [all data]                     | $R_1 = 0.0973, wR_2 = 0.2209$                                 |                              |
| Largest diff. peak/hole / $e \text{ \AA}^{-3}$ | 1.47/-1.10                                                    |                              |

---
